# Supplementary material
Source: publisher figshare collection journal article supplement (https://sage.figshare.com/ndownloader/files/15254576)
Supplement: Supplementary file 1 [file 15254576]

**Supplementary Table 4.** Subgroup analysis: logistic regression analysis for the association between weight modality (EBW versus MBW subgroups) and the outcome measures.

| Logistic regression analyses   |                  |                           |
|--------------------------------|------------------|---------------------------|
| Outcome                        | OR (95% CI)      | aOR (95% CI) <sup>a</sup> |
| sICH                           | 1.09 (0.83–1.46) | 1.16 (0.83–1.62)          |
| • EBW vs. MBW                  |                  |                           |
| sICH                           | 1.01 (0.72–1.42) | 1.08 (0.74–1.59)          |
| • EBW vs. inbuilt weighing bed |                  |                           |
| sICH                           | 1.22 (0.83–1.79) | 1.36 (0.87–2.10)          |
| • EBW vs. patient scale sling  |                  |                           |
| mRS 0–2 at 90 days             | 1.01 (0.88–1.16) | 0.99 (0.82–1.21)          |
| • EBW vs. MBW                  |                  |                           |
| mRS 0–2 at 90 days             | 1.00 (0.86–1.18) | 0.96 (0.75–1.22)          |
| • EBW vs. inbuilt weighing bed |                  |                           |
| mRS 0–2 at 90 days             | 1.01 (0.83–1.24) | 1.05 (0.81–1.36)          |
| • EBW vs. patient scale sling  |                  |                           |

EBW: estimated body weight; MBW: measured body weight; OR: odds ratio; aOR: adjusted OR.

<sup>a</sup> aOR, adjusted for: age; atrial fibrillation; diabetes mellitus; hypertension; hyperlipidemia; admission NIHSS, CT in the ER and IVT-volume.

**Supplementary Table 5.** Logistic and linear regression analysis for the association between weight modality (EBW versus MBW subgroups) and the outcome measures with the original dataset (without imputing missing data).

| Logistic regression analyses   |                      |                           |
|--------------------------------|----------------------|---------------------------|
| Outcome                        | OR (95% CI)          | aOR (95% CI) <sup>a</sup> |
| sICH                           | 1.09 (0.83–1.46)     | 1.13 (0.81–1.59)          |
| • EBW vs. MBW                  |                      |                           |
| sICH                           | 1.01 (0.72–1.42)     | 1.03 (0.70–1.51)          |
| • EBW vs. inbuilt weighing bed |                      |                           |
| sICH                           | 1.22 (0.83–1.79)     | 1.37 (0.87–2.15)          |
| • EBW vs. patient scale sling  |                      |                           |
| mRS 0–2 at 90 days             | 1.16 (0.99–1.63)     | 0.95 (0.75–1.19)          |
| • EBW vs. MBW                  |                      |                           |
| mRS 0–2 at 90 days             | 1.13 (0.94–1.35)     | 0.89 (0.68–1.15)          |
| • EBW vs. inbuilt weighing bed |                      |                           |
| mRS 0–2 at 90 days             | 1.23 (0.99–1.55)     | 1.09 (0.81–1.49)          |
| • EBW vs. patient scale sling  |                      |                           |
| Linear regression analysis     |                      |                           |
| Outcome                        | B (95% CI)           | B (95% CI) <sup>b</sup>   |
| DNT in minutes                 | 0.06 (-1.59–1.71)    | 0.28 (-1.69–2.25)         |
| • EBW vs. MBW                  |                      |                           |
| DNT in minutes                 | 3.99 (1.97– 6.03)    | 3.74 (1.55–5.93)          |
| • EBW vs. inbuilt weighing bed |                      |                           |
| DNT in minutes                 | -4.57 (-6.72– -2.42) | -4.67 (-7.23– -2.09)      |
| • EBW vs. patient scale sling  |                      |                           |

EBW: estimated body weight; MBW: measured body weight; OR: odds ratio; aOR: adjusted OR; B: unstandardized regression coefficient.

<sup>a</sup> aOR, adjusted for: age; atrial fibrillation; diabetes mellitus; hypertension; hyperlipidemia; admission NIHSS,

CT in the ER and IVT-volume.

<sup>b</sup> B, adjusted for: blood pressure exceeding threshold for IVT; admission NIHSS, CT in the ER, onset-to-door time and IVT-volume.

**Supplementary Table 6.** *Post hoc* sensitivity analysis: logistic and linear regression analysis for the association between weight modality (EBW versus MBW subgroups) and the outcome measures (excluding patients with unknown clinical outcome).

| Logistic regression analyses   |                      |                           |
|--------------------------------|----------------------|---------------------------|
| Outcome                        | OR (95% CI)          | aOR (95% CI) <sup>a</sup> |
| sICH                           | 1.49 (0.84–2.67)     | 1.58 (0.80–3.12)          |
| • EBW vs. MBW                  |                      |                           |
| sICH                           | 1.13 (0.55–2.30)     | 1.10 (0.51–2.38)          |
| • EBW vs. inbuilt weighing bed |                      |                           |
| sICH                           | 1.95 (0.89–4.26)     | 2.83 (1.03–7.79)          |
| • EBW vs. patient scale sling  |                      |                           |
| Linear regression analysis     |                      |                           |
| Outcome                        | B (95% CI)           | B (95% CI) <sup>b</sup>   |
| DNT in minutes                 | 0.06 (-1.59–1.71)    | 0.28 (-1.69–2.25)         |
| • EBW vs. MBW                  |                      |                           |
| DNT in minutes                 | 7.54 (6.27– 8.82)    | 7.25 (5.95– 8.55)         |
| • EBW vs. inbuilt weighing bed |                      |                           |
| DNT in minutes                 | -1.98 (-3.12– -0.84) | -2.94 (-4.23– -1.66)      |
| • EBW vs. patient scale sling  |                      |                           |

EBW: estimated body weight; MBW: measured body weight; OR: odds ratio; aOR: adjusted OR; B: unstandardized regression coefficient.

<sup>a</sup> aOR, adjusted for: age; atrial fibrillation; diabetes mellitus; hypertension; hyperlipidemia; admission NIHSS, CT in the ER and IVT-volume.

<sup>b</sup> B, adjusted for: blood pressure exceeding threshold for IVT; admission NIHSS, CT in the ER, onset-to-door time and IVT-volume.
